# Supplementary material
Source: HighWire-hosted journal article supplement (https://jnm.snmjournals.org/highwire/filestream/94050/field_highwire_adjunct_files/0/67140_Supplemental_Figures.pdf)
Supplement: 67140_Supplemental_Figures.pdf [file 67140_Supplemental_Figures.pdf]

### Biodistribution in Tax<sup>+</sup> Mice at 1 h p.i.

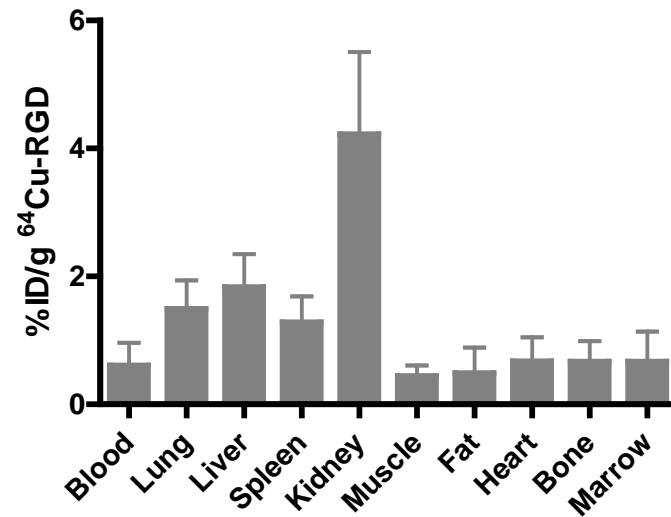

Supplemental Figure 1. Radiopharmaceutical retention in Tax<sup>+</sup> mouse tissues at 1 h p.i. Uptake in the kidney is high suggesting renal clearance as the main route of excretion.

### Liver Uptake in Tax<sup>+</sup> and WT Mice

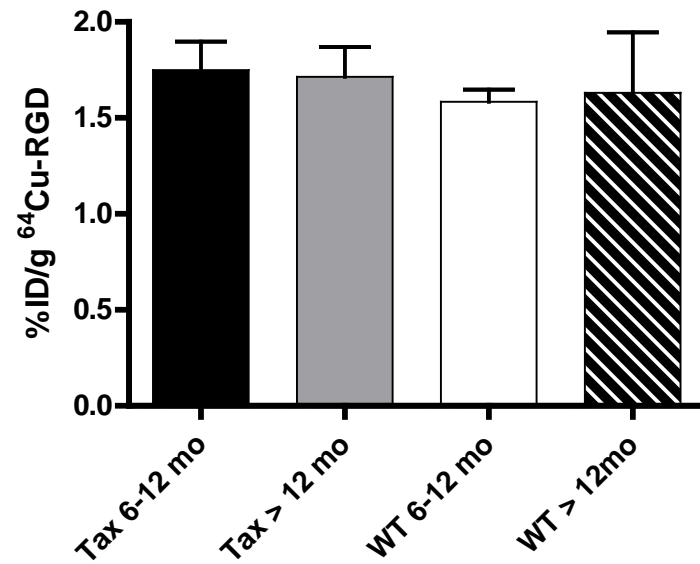

Supplemental Figure 2. Radiopharmaceutical retention is not significantly different in the liver tissue of Tax<sup>+</sup> and WT mice.
